# Supplementary material for: Reconstructing the complex evolutionary history of mobile plasmids in red algal genomes
Source: PubMed Central journal article supplement (PMC4814812; doi:10.1038/srep23744), 2016-03-31
Supplement: srep23744-s1.pdf [file srep23744-s1.pdf]

## Supplementary information

# Reconstructing the complex evolutionary history of mobile plasmids in red algal genomes

JunMo Lee<sup>1</sup>, Kyeong Mi Kim<sup>2</sup>, Eun Chan Yang<sup>3</sup>, Kathy A. Miller<sup>4</sup>, Sung Min Boo<sup>5</sup>, Debashish Bhattacharya<sup>6</sup>, & Hwan Su Yoon<sup>1,\*</sup>

### List of Tables

**Table S1.** Information about the NGS data for five newly sequenced red algal plastid genomes.

**Table S2.** Gene compositions of red algal plastid genomes.

**Table S3.** List of 193 plastid protein-coding genes used in the ML tree search.

**Table S4.** Newly annotated genes from previously published red algal plastid genomes. These genes have been overlooked, underestimated or mis-annotated in previous studies.

**Table S5.** Results of BLASTx search using plasmid-derived regions in plastid genomes. Cutoff of  $e$ -value is  $1.0e^{-05}$  and two cases of relaxed  $e$ -value ( $2.0e^{-01}$  and  $3.0e^{-03}$ ) are adapted to Gle4293 *orf4* of *Sporolithon* and Gro4059 *orf2347* of *Grateloupia*. Abbreviations: HyP indicates hypothetical protein as in *orf* for the open reading frame, PG for the pseudogenized gene. In the plastid genome region of *Sporolithon durum*, between *argB* and *ftsH* gene, 4.2 kb (non-coding) includes two plasmid-derived pseudogenized genes. In the plastid genome of *S. durum*, the region between rRNAs and *ycf27* pm\_*orf86* shows uncertain mixed plasmid signals from BLASTx search results. The plastid genome of *Gracilariopsis tenuistipitata* var. *liui* also shows uncertain plasmid signals between *leuD* and *psbD* gene.

**Table S6.** Samples used in this study.

**Table S7.** Combined and pseudogenized cases of plasmid-derived regions. Several partial regions of plasmid-derived regions were combined into each single or pseudogenized gene based on their alignment as complementary parts. Detailed information about these sequences is shown below the table. In the genome of *Moorea producens*, hypothetical protein (GI: 332351884) and both flanking regions were combined and these bacterial sequences were translated using the Bacterial, Archaeal and Plant Plastid Code (codon table 11). In the mitochondrial genome of *Marchantia polymorpha*, *orf196* (GI: 11467138) and *orf207* (GI: 11467137) were combined with their flanking non-coding regions respectively, and their two regions were also combined as a single pseudo-gene (89 bp interval between two regions). For phylogenetic analysis, these plant mitochondrial sequences have been translated to amino acids using a standard code (codon table 1). In red algae, each part of pseudo-gene regions was translated using the codon table 11 and combined serially.

**Table S8.** Contents of subfamily groups in DNA polymerase type-B family catalytic domain (POLBc) superfamily from conserved domain database (CDD).

**Table S9.** List of published red algal plasmids. 13 species out of a total 36 red algal species surveyed contain plasmids (marked as “present [O]”). Among 13 species, 14 plasmid sequences were reported from only 5 species (*Porphyra pulchra*, *Pyropia tenera*, *Gracilaria chilensis*, *Gracilaria robusta* and *Gracilariopsis lemaneiformis*) in the NCBI database. 14 plasmid sequences encoded 56 open-reading frames (*orf*).

**Table S10.** Primer information for population analysis. Different individuals of *Gelidium elegans*, *Porphyra pulchra* and *Sporolithon durum* were used to check the presence or absence of the plasmid-derived region. The plasmid-derived regions of *G. elegans* (between *ycf27* and *psbD* gene), *P. pulchra* (between *orf121* and *apcF* gene) and *S. durum* (between pseudogenized *syfB* and *rps1* gene) were confirmed by PCR.

## List of Figures

**Fig. S1.** Plastid genome map of *Porphyra pulchra*. Functional gene groups are color-coded. Genes drawn inside of the circle indicate the transcriptionally clockwise strand, and genes on outside indicate the counter-clockwise strand.

**Fig. S2.** Plastid genome map of *Sporolithon durum*. Functional gene groups are color-coded. Genes drawn inside of the circle indicate the transcriptionally clockwise strand, and genes on outside indicate the counter-clockwise strand.

**Fig. S3.** Plastid genome map of *Gelidium elegans*. Functional gene groups are color-coded. Genes drawn inside of the circle indicate the transcriptionally clockwise strand, and genes on outside indicate the counter-clockwise strand.

**Fig. S4.** Plastid genome map of *Gelidium vagum*. Functional gene groups are color-coded. Genes drawn inside of the circle indicate the transcriptionally clockwise strand, and genes on outside indicate the counter-clockwise strand.

**Fig. S5.** Plastid genome map of *Gracilaria chilensis*. Functional gene groups are color-coded. Genes drawn inside of the circle indicate the transcriptionally clockwise strand, and genes on outside indicate the counter-clockwise strand.

**Fig. S6.** Maximum likelihood tree based on aligned amino acid sequences of concatenated 193 protein encoding genes from 16 published and 5 new (underlined) plastid genomes (2000 replications, bootstrap support > 50%).

**Fig. S7.** Synteny of all plasmid-derived regions in red algae. Colored boxes indicate each homolog region in red algal plasmid and plastid genomes. *Porphyra pulchra* plasmid Pp6859 *orf4* and *orf5* homolog regions are also presented with two cyanobacterial species.

**Fig. S8.** Maximum likelihood tree based on aligned amino acid sequences of *Gracilariopsis lemaneiformis* plasmid GL3.5 *orf2* related genes and its homologs from BLASTp search (cutoff  $e$ -value  $1.0e^{-03}$ ) (2000 replications, bootstrap support > 50%). Taxon information and their sequence localities are color-coded as follows: bacteria (black), red algae (red), virus (violet), plastid (green) and plasmid (brown).

**Fig. S9.** Maximum likelihood tree based on aligned amino acid sequences of red algal replicase genes from *Pyropia tenera* (GI: 254029132, 17980119) plasmids, *Porphyra pulchra* plasmid (GI: 7108461, 7108459, 7108457) and their homologs from BLASTp search (cutoff  $e$ -value  $1.0e^{-05}$ ) (2000 replications, bootstrap support > 50%). Taxon information and their sequence localities were indicated with color-code as follows: parasitic bacteria (blue), plant (green), red algae (red), rhizaria (cyan), stramenopile (brown), plasmid (violet), mitochondria (orange) and nucleus (black).

**Table S1.** Information about the NGS data for five newly sequenced red algal plastid genomes.

| No. | Taxa                        | Total bases of NGS sequencing data (Mbp) | Size of complete plastid genome (bp) | Total bases of mapped plastid genome (bp) | Average coverage of plastid genome (X) |
|-----|-----------------------------|------------------------------------------|--------------------------------------|-------------------------------------------|----------------------------------------|
| 1   | <i>Gelidium elegans</i>     | 1,529 Mbp                                | 174,749 bp                           | 44,027,950 bp                             | 228X                                   |
| 2   | <i>Gelidium vagum</i>       | 990 Mbp                                  | 179,852 bp                           | 66,802,278 bp                             | 339X                                   |
| 3   | <i>Gracilaria chilensis</i> | 506 Mbp                                  | 185,637 bp                           | 87,006,562 bp                             | 445X                                   |
| 4   | <i>Porphyra pulchra</i>     | 263 Mbp                                  | 194,175 bp                           | 12,007,987 bp                             | 52X                                    |
| 5   | <i>Sporolithon durum</i>    | 3,190 Mbp                                | 191,464 bp                           | 32,008,868 bp                             | 159X                                   |

**Table S2.** Gene compositions of red algal plastid genomes.

| Species                                                          | Reference                  | GC (%) | Coding genes | tRNAs   | rRNAs | Introns |
|------------------------------------------------------------------|----------------------------|--------|--------------|---------|-------|---------|
| <b>Cyandiophyceae</b>                                            |                            |        |              |         |       |         |
| <i>Cyanidioschyzon merolae</i><br>(NC_004799)                    | Ohta et al. 2003           | 37.6   | 207          | 31      | 3     | 0       |
| <i>Cyanidium caldarium</i><br>(NC_001840)                        | Glöckner et al.<br>2000    | 32.7   | 199 (2*)     | 30      | 3     | 0       |
| <i>Galdieria sulphuraria</i><br>(NC_024665)                      | Jain et al. 2014           | 28.5   | 182          | 39      | 6     | 0       |
| <b>Porphyridiophyceae</b>                                        |                            |        |              |         |       |         |
| <i>Porphyridium purpureum</i><br>(NC_023133)                     | Tajima et al. 2014         | 30.3   | 224          | 29      | 6     | 43      |
| <b>Bangiophyceae</b>                                             |                            |        |              |         |       |         |
| <i>Porphyra pulchra</i>                                          | <b>This study</b>          | 33.3   | 207          | 37      | 6     | 0       |
| <i>Porphyra purpurea</i><br>(NC_000925)                          | Reith &<br>Munholland 1995 | 33.0   | 209          | 37      | 6     | 0       |
| <i>Porphyra umbilicalis</i><br>(JQ408795)                        | Smith et al. 2012          | 32.9   | 208 (1*)     | 37      | 6     | 0       |
| <i>Pyropia fucicola</i><br>(KJ776837)                            | Hughey et al. 2014         | 32.7   | 207 (4*)     | 35      | 3     | 0       |
| <i>Pyropia haitanensis</i><br>(NC_021189)                        | Wang et al. 2013           | 33.0   | 213 (2*)     | 37      | 6     | 0       |
| <i>Pyropia kanakaensis</i><br>(KJ776836)                         | Hughey et al. 2014         | 32.8   | 210 (4*)     | 35      | 3     | 0       |
| <i>Pyropia perforata</i><br>(NC_024050)                          | Hughey et al. 2014         | 32.9   | 211 (2*)     | 35      | 3     | 0       |
| <i>Pyropia yezoensis</i><br>(NC_007932)                          | Wang et al. 2013           | 33.1   | 213          | 37      | 6     | 0       |
| <b>Floriophyceae</b>                                             |                            |        |              |         |       |         |
| <i>Calliarthron tuberculosum</i><br>(NC_021075)                  | Janouškovec et al.<br>2013 | 29.2   | 201          | 31      | 3     | 2       |
| <i>Sporolithon durum</i>                                         | <b>This study</b>          | 29.3   | 202          | 30      | 3     | 2       |
| <i>Chondrus crispus</i><br>(NC_020795)                           | Janouškovec et al.<br>2013 | 28.7   | 204          | 30      | 3     | 1       |
| <i>Gelidium elegans</i>                                          | <b>This study</b>          | 30.2   | 202          | 30      | 3     | 1       |
| <i>Gelidium vagum</i>                                            | <b>This study</b>          | 29.9   | 201          | 30      | 3     | 1       |
| <i>Gracilaria chilensis</i>                                      | <b>This study</b>          | 29.3   | 203          | 30      | 3     | 1       |
| <i>Gracilaria salicornia</i><br>(NC_023785)                      | Campbell et al.<br>2014    | 28.8   | 203 (1*)     | 30 (1*) | 3     | 1 (1*)  |
| <i>Gracilaria tenuistipitata</i><br>var. <i>liui</i> (NC_006137) | Hagopian et al.<br>2004    | 29.2   | 205 (2*)     | 30 (1*) | 3     | 1 (1*)  |
| <i>Grateloupia taiwanensis</i><br>(NC_021618)                    | DePriest et al.<br>2013    | 30.6   | 234 (1*)     | 30 (1*) | 3     | 1 (1*)  |

\*: including un-annotated genes in previous reports

**Table S3.** List of 193 plastid protein-coding genes used in the ML tree search.

See the file “Table\_S3\_S4\_S7\_supplementary\_tables.xlsx” (sheet Table S3).

**Table S4.** Newly annotated genes from previously published red algal plastid genomes. These genes have been overlooked, underestimated or mis-annotated in previous studies. Detailed information is shown in remarks.

See the file “Table\_S3\_S4\_S7\_supplementary\_tables.xlsx” (sheet Table S4).



**Table S5.** Results of BLASTx search using plasmid-derived regions in plastid genomes. Cutoff of  $e$ -value is  $1.0e^{-05}$  and two cases of relaxed  $e$ -value ( $2.0e^{-01}$  and  $3.0e^{-03}$ ) are adapted to Gle4293 *orf4* of *Sporolithon* and Gro4059 *orf2347* of *Grateloupia*. Abbreviations: HyP indicates hypothetical protein same as in *orf* for the open reading frame, PG for the pseudogenized gene. The plastid genome region of *Sporolithon durum* between *argB* and *ftsH* gene is 4.2 kb non-coding part that includes two plasmid-derived pseudogenized genes. Between rRNAs and *ycf27* in plastid genome of *S. durum*, pm\_ *orf86* shows uncertain mixed plasmid signals from BLASTx search results. The plastid genome of *Gracilariopsis tenuistipitata* var. *liui* also shows uncertain plasmid signals between *leuD* and *psbD* gene.

| Species                                           | Locality                       | Region            | Feature        | Size    | Matched results          | E-value | Identities | GI        | Remarks                                            |
|---------------------------------------------------|--------------------------------|-------------------|----------------|---------|--------------------------|---------|------------|-----------|----------------------------------------------------|
| <i>Porphyra pulchra</i>                           | <i>orf121-apcF</i>             | -                 | PG             | 585 bp  | Pp6427 <i>orf3</i>       | 1.E-39  | 45%        | 11466611  |                                                    |
|                                                   | <i>petG-rps14</i>              | -                 | PG             | 414 bp  | Pp6859 <i>orf7</i>       | 3.E-44  | 63%        | 11466621  |                                                    |
| <i>Pyropia haitanensis</i>                        | <i>petG-rps14</i>              | -                 | PG             | 291 bp  | Pp6859 <i>orf6</i>       | 3.E-22  | 48%        | 11466620  |                                                    |
|                                                   | <i>petG-rps14</i>              | pm_ <i>orf72</i>  | <i>orf</i>     | 216 bp  | Pp6859 <i>orf5</i>       | 9.E-12  | 55%        | 11466341  | un-annotated gene previously                       |
|                                                   | <i>ycf12-ftrB</i>              | -                 | PG             | 399 bp  | Pp6859 <i>orf4</i>       | 4.E-36  | 51%        | 11466618  |                                                    |
|                                                   | <i>ycf12-ftrB</i>              | pm_ <i>orf93</i>  | <i>orf</i>     | 279 bp  | Pp6427 <i>orf1</i>       | 1.E-12  | 59%        | 11466609  | un-annotated gene previously                       |
| <i>Sporolithon durum</i>                          | PG( <i>syfB</i> )- <i>rps1</i> | pm_ <i>orf185</i> | <i>orf</i>     | 555 bp  | Gle4293 <i>orf4</i>      | 2.E-01  | 26%        | 11465618  | relaxed e-value, Pp6859 <i>orf1</i> region mixed   |
|                                                   | PG( <i>syfB</i> )- <i>rps1</i> | pm_ <i>orf73</i>  | <i>orf</i>     | 219 bp  | Pp6859 <i>orf6</i>       | 4.E-06  | 37%        | 11466620  |                                                    |
|                                                   | PG( <i>syfB</i> )- <i>rps1</i> | pm_ <i>orf819</i> | <i>orf</i>     | 2457 bp | <i>Calothrix</i> sp. HyP | 1.E-146 | 36%        | 668693613 | Pp6859 <i>orf4</i> and <i>orf5</i> homolog         |
|                                                   | <i>argB-ftsH</i>               | -                 | PG             | 312 bp  | <i>Calothrix</i> sp. HyP | 8.E-09  | 78%        | 668693613 | copy region of pm_ <i>orf819</i>                   |
|                                                   | <i>argB-ftsH</i>               | -                 | PG             | 381 bp  | Gch7220 <i>orf5</i>      | 5.E-14  | 36%        | 11465596  |                                                    |
| <i>Gelidium elegans</i>                           | <i>ycf27-psbD</i>              | -                 | PG             | 831 bp  | Pp6859 <i>orf5</i>       | 2.E-38  | 36%        | 11466341  |                                                    |
| <i>Gelidium vagum</i>                             | <i>rps6</i> -rRNAs             | -                 | PG             | 2091 bp | <i>Calothrix</i> sp. HyP | 2.E-107 | 34%        | 66863613  | Pp6859 <i>orf4</i> and <i>orf5</i> homolog         |
|                                                   | <i>rps6</i> -rRNAs             | -                 | PG             | 555 bp  | Gro4970 <i>orf5</i>      | 2.E-12  | 25%        | 11466341  |                                                    |
| <i>Grateloupia taiwanensis</i>                    | <i>ycf27-psbD</i>              | -                 | PG             | 306 bp  | GL3.5 <i>orf1</i>        | 1.E-05  | 35%        | 18514     | overlapped to unique <i>orf31</i> & <i>orf32</i>   |
|                                                   | rRNAs- <i>ycf27</i>            | -                 | PG             | 183 bp  | GL3.5 <i>orf2</i>        | 3.E-12  | 74%        | 18515     | overlapped to unique <i>orf06</i>                  |
|                                                   | <i>ycf27-psbD</i>              | -                 | PG             | 303 bp  | Gro4059 <i>orf2347</i>   | 3.E-03  | 27%        | 11466334  | relaxed e-value, overlapped to unique <i>orf32</i> |
| <i>Gracilaria salicornia</i>                      | <i>ycf27-psbD</i>              | <i>orf139</i>     | <i>orf</i> +PG | 495 bp  | Gro4970 <i>orf1</i>      | 3.E-24  | 50%        | 11466337  |                                                    |
| <i>Gracilaria tenuistipitata</i> var. <i>liui</i> | rRNAs- <i>ycf27</i>            | -                 | PG             | 441 bp  | Gle4293 <i>orf1</i>      | 5.E-14  | 64%        | 11465615  |                                                    |
| <i>Gracilaria chilensis</i>                       | <i>leuD-psbD</i>               | -                 | PG             | 606 bp  | Gle4293 <i>orf1</i>      | 7.E-37  | 61%        | 11465615  |                                                    |
|                                                   | <i>leuD-psbD</i>               | -                 | PG             | 300 bp  | Gle4293 <i>orf2</i>      | 6.E-08  | 36%        | 11465616  |                                                    |
|                                                   | <i>leuD-psbD</i>               | -                 | PG             | 408 bp  | Gle4293 <i>orf3</i>      | 1.E-23  | 52%        | 11465617  |                                                    |

**Table S6.** Sampling information used in this study.

| No. | Taxa                        | Strain No. | Date          | Locality                            |
|-----|-----------------------------|------------|---------------|-------------------------------------|
|     |                             | SKKU18     | Oct. 27, 2012 | Anin, Gang-reung, Korea             |
| 1   | <i>Gelidium elegans</i>     | SKKU22     | Oct. 27, 2012 | Gamchusa, Donghae-si, Korea         |
|     |                             | SKKU28     | Oct. 22, 2012 | Wando, Jungdo-ri, Korea             |
| 2   | <i>Gelidium vagum</i>       | -          | Jul. 23, 2012 | Manripo, Tae-an, Korea              |
| 3   | <i>Gracilaria chilensis</i> | -          | Feb. 1, 2003  | Ancud, Chile                        |
|     |                             | UC1879714  | Jun. 20, 1970 | Moss Beach, California, USA         |
| 4   | <i>Porphyra pulchra</i>     | UC1454976  | Jun. 20, 1970 | Moss Beach, California, USA         |
|     |                             | SKKU_SD01  | Nov. 6, 2012  | Army Bay, Whangaparaoa, New Zealand |
| 5   | <i>Sporolithon durum</i>    | SKKU_SD02  | Aug. 28, 2014 | Army Bay, Whangaparaoa, New Zealand |
|     |                             | SKKU_SD03  | Aug. 28, 2014 | Army Bay, Whangaparaoa, New Zealand |

**Table S7.** Information about the combination and separation of plasmid-derived regions. Several partial *orf* regions were combined into one single *orf*, while an *orf* was separated into two genes based on the complementary alignment. In the genome of *Moorea producens*, hypothetical protein (GI: 332351884) and its flanking regions (both of sides) were combined and these bacterial sequences were translated using the Bacterial, Archaeal and Plant Plastid Code (codon table 11). In the mitochondrial genome of *Marchantia polymorpha*, orf196 (GI: 11467138) and orf207 (GI: 11467137) were combined with their flanking non-coding regions, respectively, and their two regions were also combined as a single orf (89 bp interval between two regions). For phylogenetic analysis, these plant mitochondrial sequences have been translated to amino acids using a standard code (codon table 1). In red algae, each part of sequences were translated. All these red algal sequences were translated using the codon table 11.

See the file “Table\_S3\_S4\_S7\_supplementary\_tables.xlsx” (sheet Table S7).

**Table S8.** Contents of subfamily groups in DNA polymerase type-B family catalytic domain (POLBc) superfamily from conserved domain database (CDD).

| Conserved domain database                                                | Accession |
|--------------------------------------------------------------------------|-----------|
| POLBc superfamily                                                        | cl10023   |
| DNA polymerase type-B family catalytic domain (POLBc)                    | cd00145   |
| DNA polymerase type-B B1 subfamily catalytic domain (POLBc B1)           | cd05530   |
| DNA polymerase type-B B2 subfamily catalytic domain (POLBc B2)           | cd05531   |
| DNA polymerase type-B alpha subfamily catalytic domain (POLBc alpha)     | cd05532   |
| DNA polymerase type-B delta subfamily catalytic domain (POLBc delta)     | cd05533   |
| DNA polymerase type-B zeta subfamily catalytic domain (POLBc zeta)       | cd05534   |
| DNA polymerase type-B epsilon subfamily catalytic domain (POLBc epsilon) | cd05535   |
| DNA polymerase type-B B3 subfamily catalytic domain (POLBc B3)           | cd05536   |
| DNA polymerase type-II subfamily catalytic domain (POLBc Pol II)         | cd05537   |
| DNA polymerase type-II B subfamily catalytic domain (POLBc Pol II B)     | cd05538   |

**Table S9.** List of published red algal plasmids. 13 species out of a total 36 red algal species surveyed contain plasmids (marked as “present [O]”). Among 13 species, 14 plasmid sequences were reported from only 5 species (*Porphyra pulchra*, *Pyropia tenera*, *Gracilaria chilensis*, *Gracilaria robusta* and *Gracilariopsis lemaneiformis*) in NCBI database. 14 plasmid sequences encoded 56 open-reading frames (*orf*).

| Order             | Species                             | Present (O), Absent (X) | No. of plasmids | Reported plasmid sequences | NCBI GI (retained proteins)                                                   | References                  |
|-------------------|-------------------------------------|-------------------------|-----------------|----------------------------|-------------------------------------------------------------------------------|-----------------------------|
| Erythropeltidales | <i>Smithora natadum</i>             | O                       | 3               | X                          |                                                                               | Goff and Coleman 1990       |
| Glaucosphaerales  | <i>Glaucosphaera vacuolata</i>      | X                       |                 |                            |                                                                               | Goff and Coleman 1990       |
| Bangiales         | <i>Porphyra linearis</i>            | X                       |                 |                            |                                                                               | Villemur 1990a              |
|                   | <i>Porphyra pulchra</i>             | O                       | 5               | 5                          | 11466614 (7),<br>11466608 (5),<br>7108460 (1),<br>7108458 (1),<br>7108456 (1) | Moon and Goff 1996, 1997    |
|                   | <i>Pyropia perforata</i>            | X                       |                 |                            |                                                                               | Goff and Coleman 1990       |
|                   | <i>Pyropia tenera</i>               | O                       | ?               | 2                          | 17980118 (1),<br>254029130 (2)                                                | Choi et al. 2001            |
|                   | <i>Wildemania miniata</i>           | O                       | 3               | X                          |                                                                               | Villemur 1990a              |
| Ceramiales        | <i>Asterocolax gardneri</i>         | X                       |                 |                            |                                                                               | Goff and Coleman 1990       |
|                   | <i>Campylaephora californica</i>    | X                       |                 |                            |                                                                               |                             |
|                   | <i>Choreocolax polysiphoniae</i>    | X                       |                 |                            |                                                                               |                             |
|                   | <i>Harveyella mirabilis</i>         | X                       |                 |                            |                                                                               |                             |
|                   | <i>Janczewski gardneri</i>          | X                       |                 |                            |                                                                               |                             |
|                   | <i>Microrcladia coulteri</i>        | X                       |                 |                            |                                                                               |                             |
|                   | <i>Odonthalia floccosa</i>          | X                       |                 |                            |                                                                               |                             |
|                   | <i>Odonthalia washingtoniensis</i>  | X                       |                 |                            |                                                                               |                             |
|                   | <i>Osmundea spectabilis</i>         | O                       | ?               | X                          |                                                                               |                             |
|                   | <i>Polyneura latissima</i>          | X                       |                 |                            |                                                                               |                             |
|                   | <i>Polysiphonia elongata</i>        | X                       |                 |                            |                                                                               |                             |
| Gigartinales      | <i>Gardneriella tubifera</i>        | X                       |                 |                            |                                                                               | Goff and Coleman 1990       |
|                   | <i>Gymnogongrus</i> sp.             | O                       | 2               | X                          |                                                                               | Villemur 1990a              |
|                   | <i>Sarcodiotheca gaudichaudii</i>   | X                       |                 |                            |                                                                               | Goff and Coleman 1990       |
| Gracilariales     | <i>Gracilaria chilensis</i> (1)     | O                       | 4               | 1                          | 18476 (1)                                                                     | Villemur 1990a              |
|                   | <i>Gracilaria chilensis</i> (2)     | O                       | ?               | 2                          | 11465608 (5),<br>11465591 (16)                                                | Goff and Moon (unpublished) |
|                   | <i>Gracilaria pacifica</i>          | O                       | 4               | X                          |                                                                               | Goff and Coleman 1990       |
|                   | <i>Gracilaria robusta</i> (1)       | O                       | ?               | 2                          | 11466336 (7),<br>11466333 (2)                                                 | Goff and Moon (unpublished) |
|                   | <i>Gracilaria robusta</i> (2)       | O                       | 1               | X                          |                                                                               | Goff and Coleman 1990       |
|                   | <i>Gracilaria textorii</i>          | O                       | 2               | X                          |                                                                               |                             |
|                   | <i>Gracilaria tikvahiae</i>         | O                       | 3               | X                          |                                                                               | Villemur 1990a              |
|                   | <i>Gracilariophila oryzoides</i>    | O                       | 2               | X                          |                                                                               | Goff and Coleman 1990       |
|                   | <i>Gracilariopsis langissima</i>    | X                       |                 |                            |                                                                               | Villemur 1990a              |
|                   | <i>Gracilariopsis lemaneiformis</i> | O                       | 3               | 2                          | 18513 (2),<br>11465614 (5)                                                    | Goff and Coleman 1990       |
|                   | <i>Gracilariopsis</i> sp.           | X                       |                 |                            |                                                                               | Villemur 1990a              |
| Halymeniales      | <i>Prionitis lanceolata</i>         | X                       |                 |                            |                                                                               | Goff and Coleman 1990       |
| Plocamiales       | <i>Plocamiocolax pulvinata</i>      | X                       |                 |                            |                                                                               | Goff and Coleman 1990       |
|                   | <i>Plocamium cartilagineum</i>      | X                       |                 |                            |                                                                               |                             |
| Rhodymeniales     | <i>Lomentaria divaricata</i>        | X                       |                 |                            |                                                                               | Goff and Coleman 1990       |

**Table S10.** Primer information for population analysis. Different individuals of *Gelidium elegans*, *Porphyra pulchra* and *Sporolithon durum* were used to check the presence or absence of plasmid-derived region. The plasmid-derived regions of *G. elegans* (between *ycf27* and *psbD* gene), *P. pulchra* (between *orf121* and *apcF* gene) and *S. durum* (between pseudogenized *syfB* and *rps1* gene) were confirmed by PCR.

| Speices                  | Strain    | Primer set                                                                                                             |
|--------------------------|-----------|------------------------------------------------------------------------------------------------------------------------|
| <i>Gelidium elegans</i>  | SKKU18    | [Forward 1]<br>Gele_F1_1: 5'-ATTCAGTCTTCTAGAACTACTAGTAA-3'<br>Gele_F1_2: 5'-AAAGACATGTTGATACAAGAGTTGTC-3'              |
|                          | SKKU22    | [Reverse 1]<br>Gele_R1_1: 5'-CTTGTCCAATTGCTATGGTCATATTA-3'<br>Gele_R1_2: 5'-AACCTTCTAGATAAGAAGACTAGCTAA-3'             |
|                          | SKKU28    | [Forward 1]<br>Pp_F1_1: 5'-TCTAGATTATAGATAGATTTAGTGCTC-3'<br>Pp_F1_2: 5'-AAGACTAGTATATTTGTTAGTGCATCA-3'                |
| <i>Porphyra pulchra</i>  | UC1879714 | [Reverse 1]<br>Pp_R1_1: 5'-AACTTTGAAGCTTTATTAGATGCAAGA-3'<br>Pp_R1_2: 5'-GCTTAGGATATTAGAATTCACAGATAA-3'                |
|                          | UC1454976 | [Forward 1]<br>Spo_F1: 5'-CTGACACTGAGACAGATATAGAAAATTA-3'<br>[Reverse 1]<br>Spo_R1: 5'-AATTATTCATCGATCTTTCATTAGACAC-3' |
| <i>Sporolithon durum</i> | SKKU_SD01 | [Forward 2]<br>Spo_F2: 5'-GTGCTAGTGTATTTAAGCTATATGAAG-3'<br>[Reverse 2]<br>Spo_R2: 5'-TTATTAAATAGAAGTTTAGCTCCATCT-3'   |
|                          | SKKU_SD02 |                                                                                                                        |
|                          | SKKU_SD03 |                                                                                                                        |







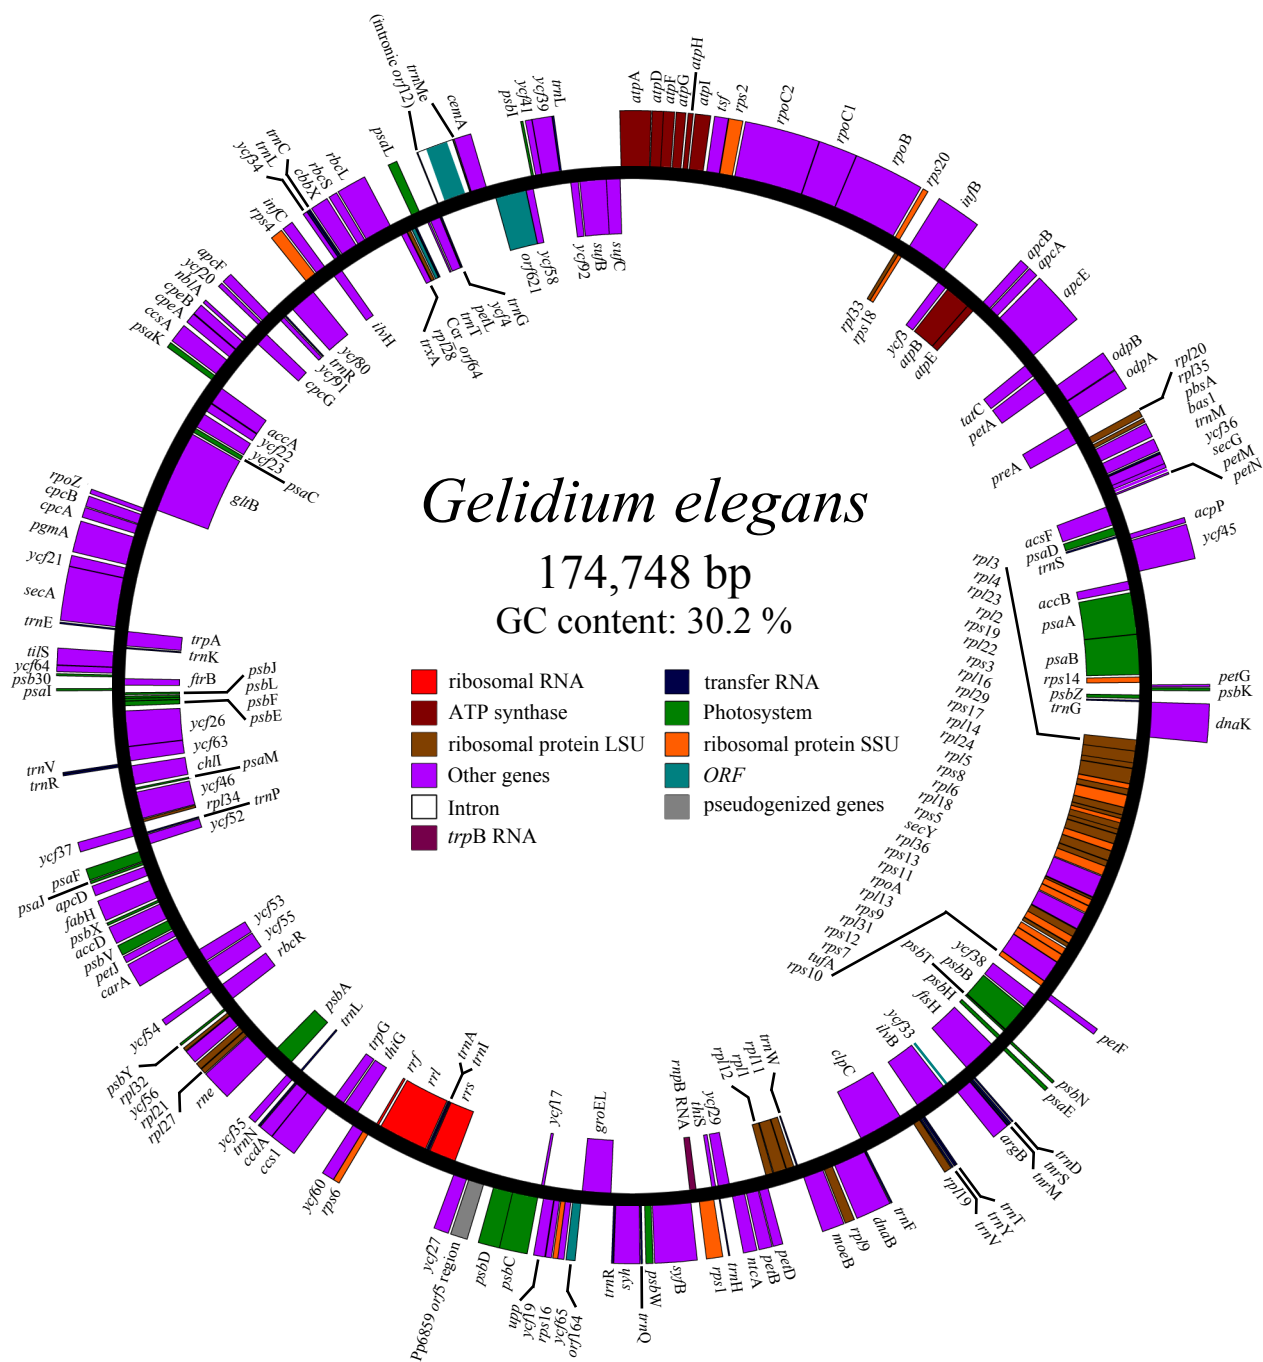

**Fig. S3.** Plastid genome map of *Gelidium elegans*. Functional gene groups are color-coded. Genes drawn inside of the circle indicate the transcriptionally clockwise strand, and genes on outside indicate the counter-clockwise strand.



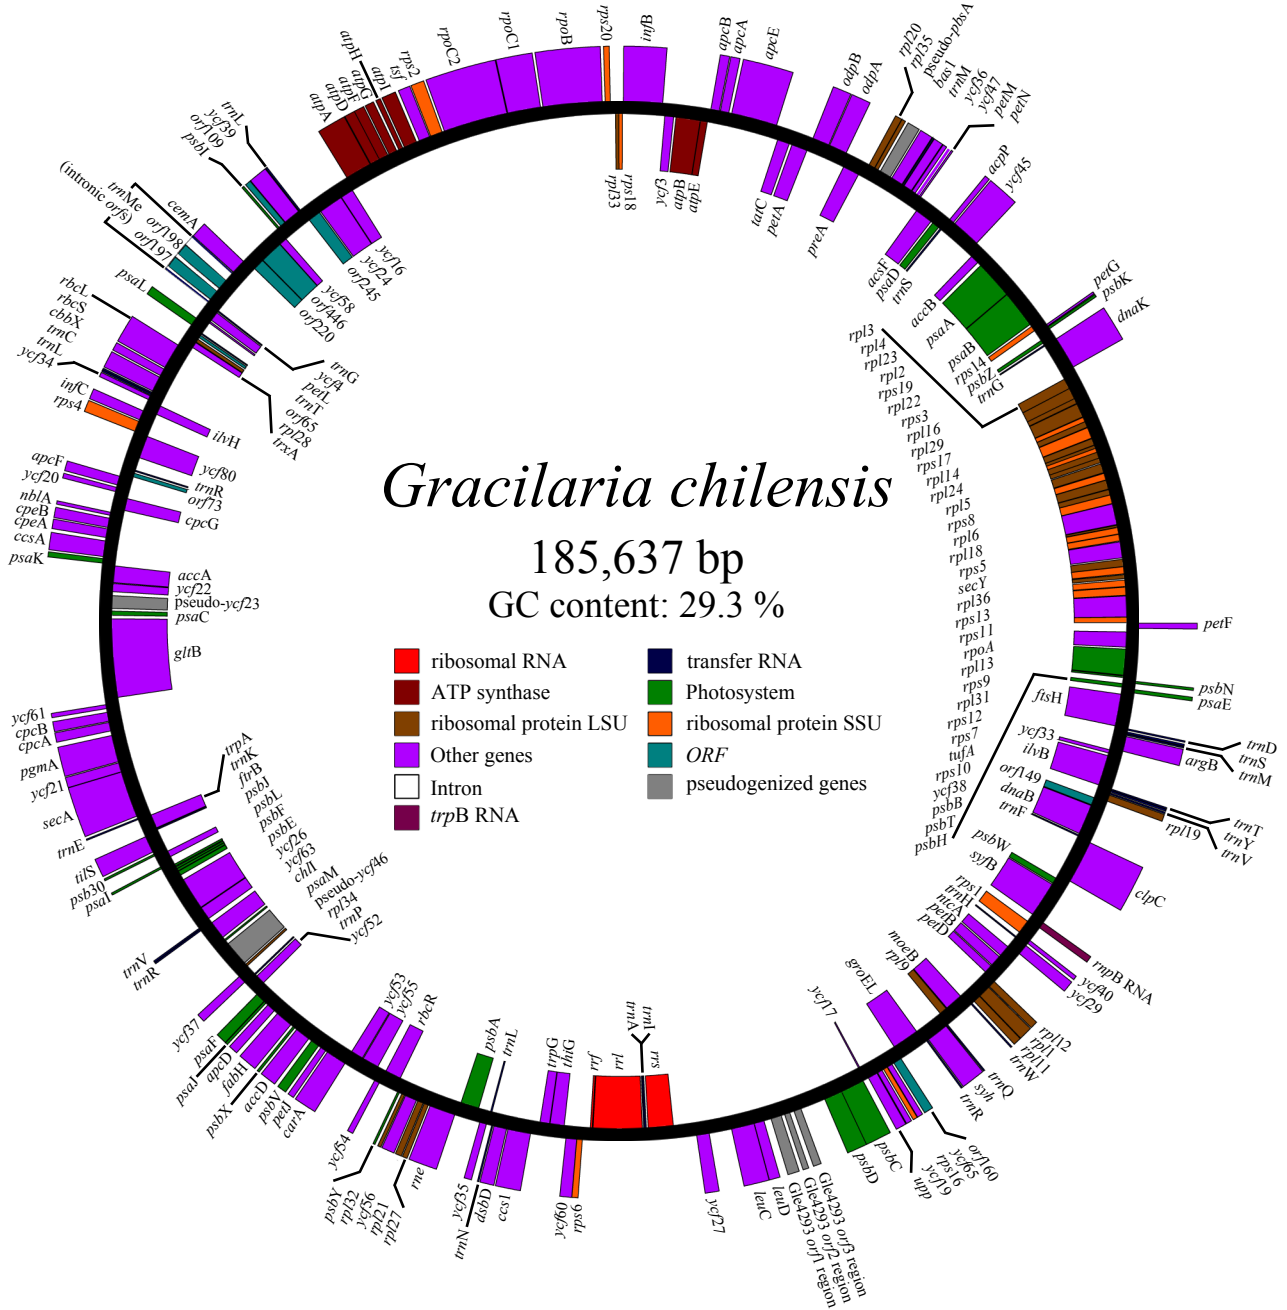

**Fig. S5.** Plastid genome map of *Gracilaria chilensis*. Functional gene groups are color-coded. Genes drawn inside of the circle indicate the transcriptionally clockwise strand, and genes on outside indicate the counter-clockwise strand.

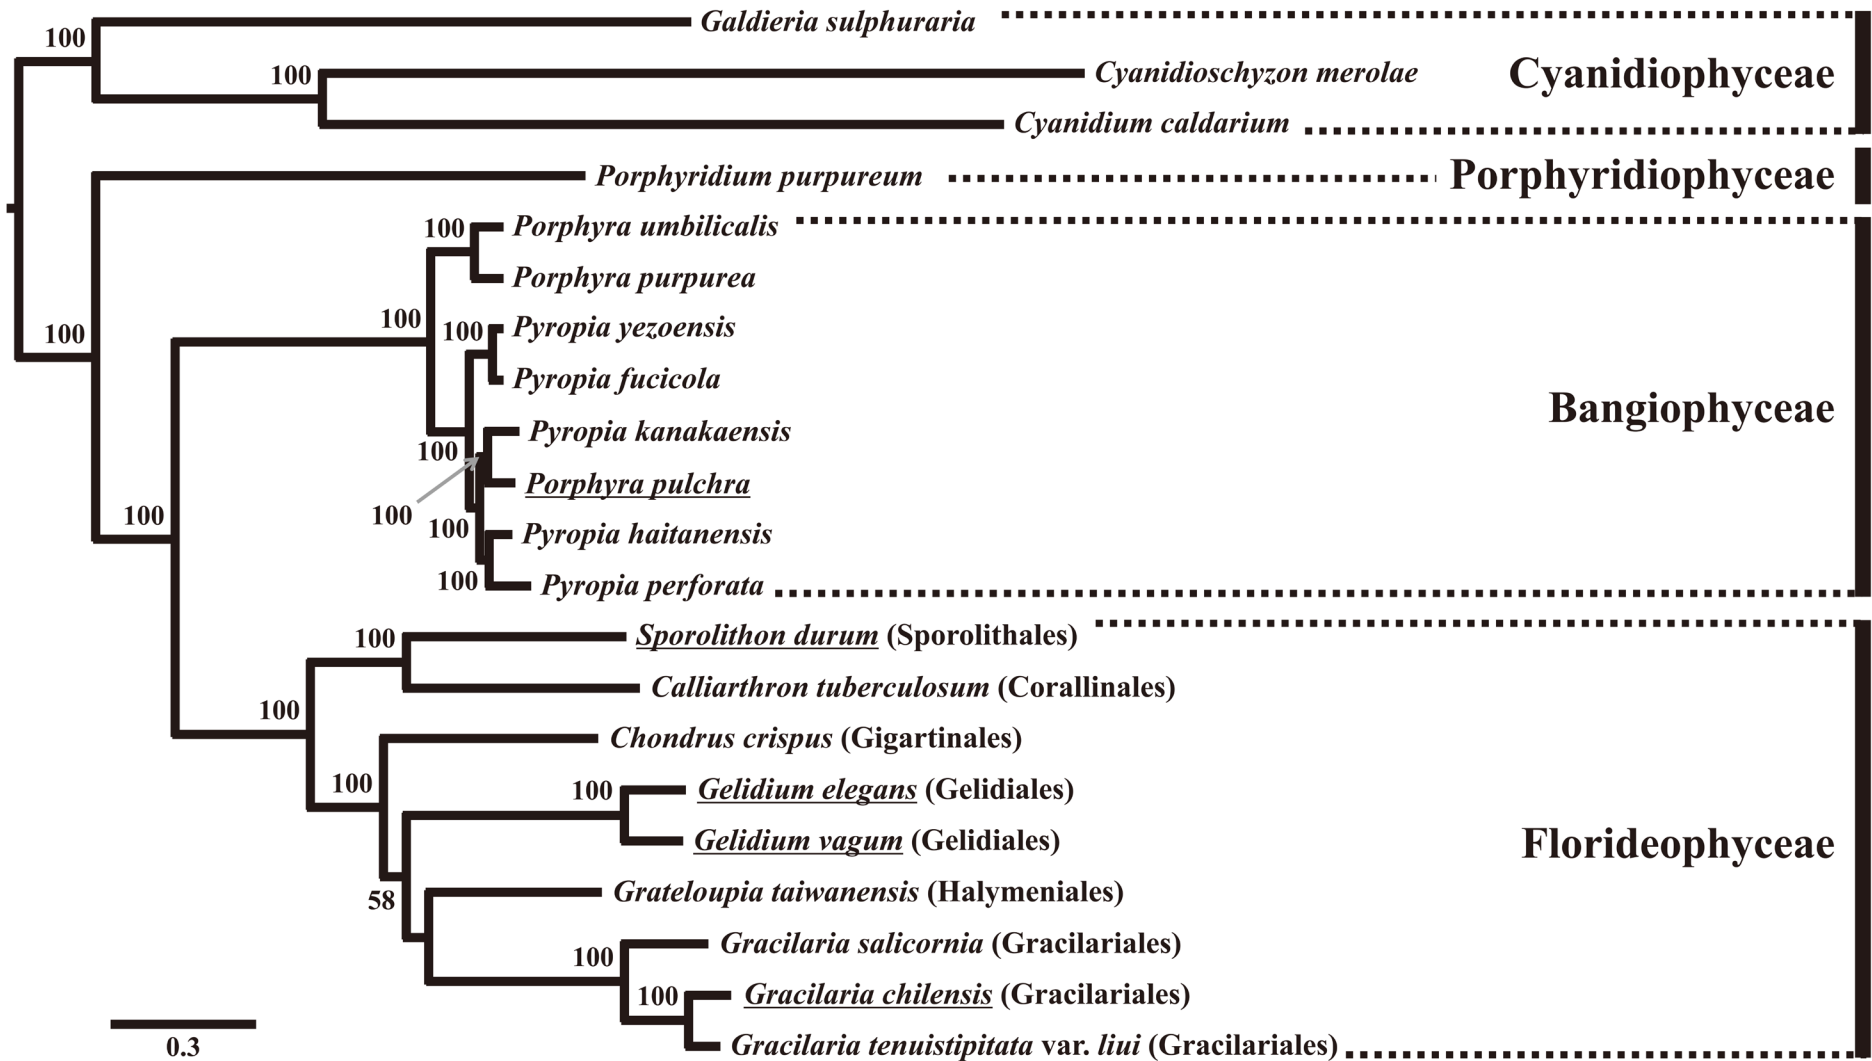

**Fig. S6.** Maximum likelihood tree based on aligned amino acid sequences of concatenated 193 protein encoding genes from 16 published and 5 new (underlined) plastid genomes (2000 replications, bootstrap support > 50%).

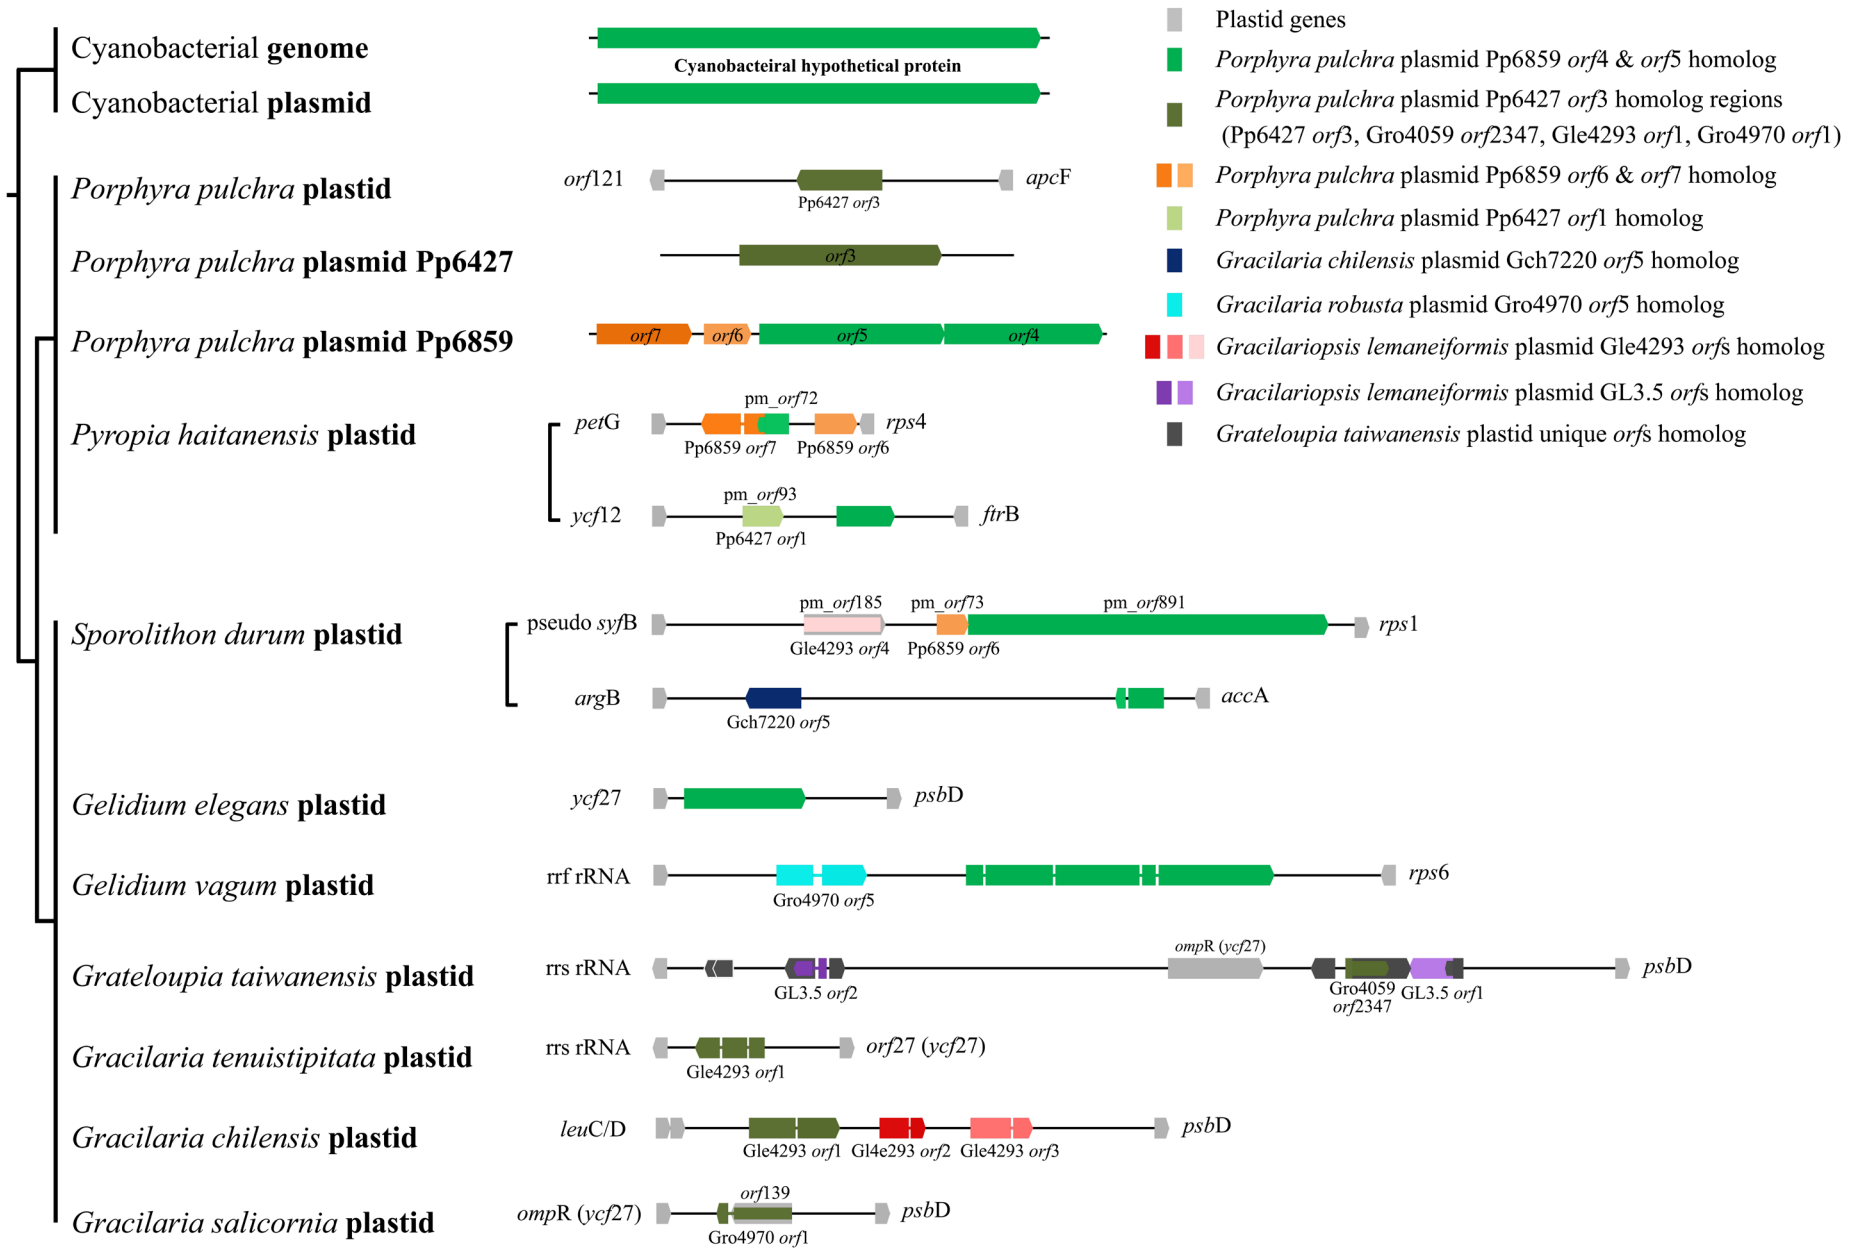

**Fig. S7.** Synteny of all plasmid-derived regions in red algae. Colored boxes indicate each homolog region in red algal plasmid and plastid genomes. *Porphyra pulchra* plasmid Pp6859 *orf4* and *orf5* homolog regions are also presented in some cyanobacterial species.

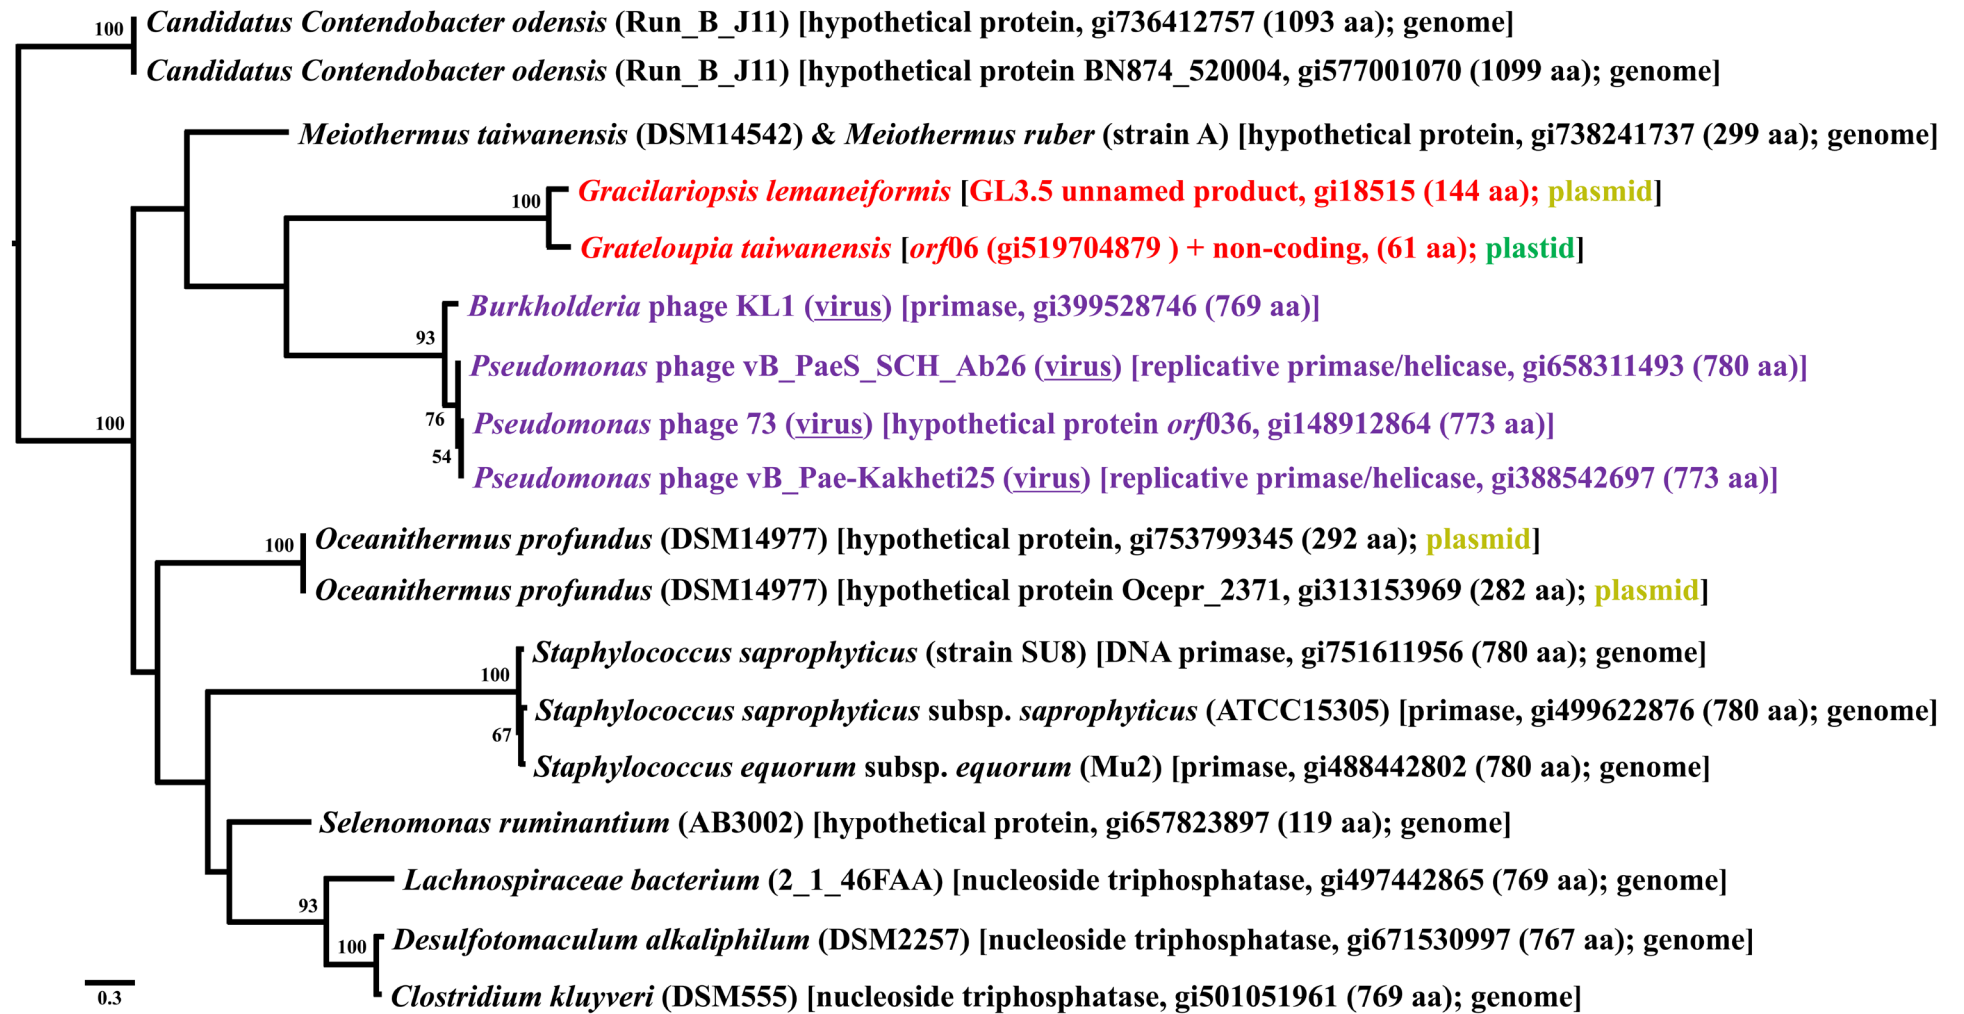

**Fig. S8.** Maximum likelihood tree based on aligned amino acid sequences of *Gracilariopsis lemaneiformis* plasmid GL3.5 *orf2* related genes and its homologs from BLASTp search (cutoff e-value 1.0e-03) (2000 replications, bootstrap support > 50%). Taxon information and their sequence localities are color-coded as follows: bacteria (black), red algae (red), virus (violet), plastid (green) and plasmid (brown).



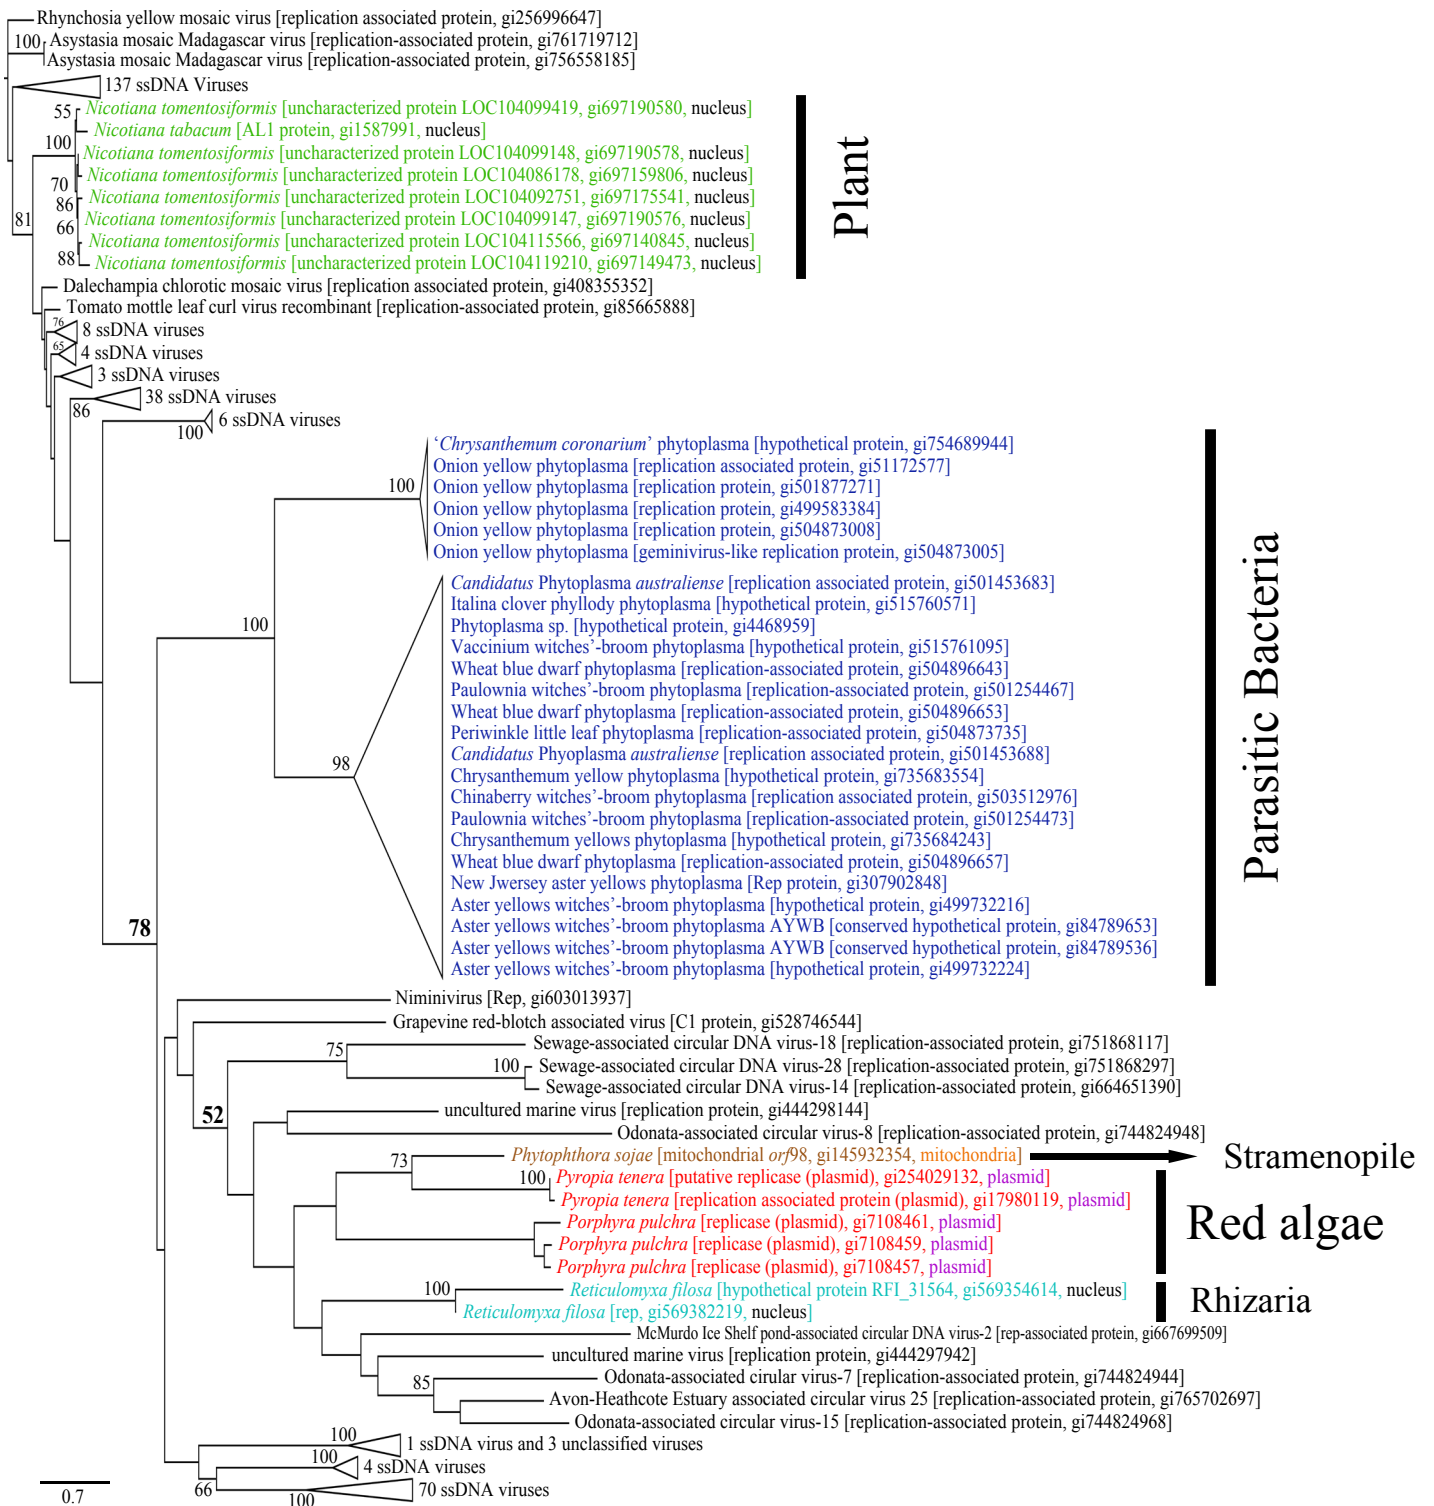

**Fig. S9.** Maximum likelihood tree based on aligned amino acid sequences of red algal replicase genes from *Pyropia tenera* (GI: 254029132, 17980119) plasmids, *Porphyra pulchra* plasmid (GI: 7108461, 7108459, 7108457) and their homologs from BLASTp search (cutoff e-value 1.0e-05) (2000 replications, bootstrap support > 50%). Taxon information and their sequence localities were indicated with color-code as follows: parasitic bacteria (blue), plant (green), red algae (red), rhizaria (cyan), stramenopile (brown), plasmid (violet), mitochondria (orange) and nucleus (black).
